# Supplementary material for: Acquirement of water-splitting ability and alteration of the charge-separation mechanism in photosynthetic reaction centers
Source: PubMed Central journal article supplement — Proc Natl Acad Sci U S A. 2020 Jun 29;117(28):16373–82. doi: 10.1073/pnas.2000895117 (PMC7368266; doi:10.1073/pnas.2000895117), 2020-06-29
Supplement: pnas.2000895117.sapp.pdf [file pnas.2000895117.sapp.pdf]

# PNAS

[www.pnas.org](http://www.pnas.org)

Supplementary Information for

Acquirement of water-splitting ability and alteration of charge-separation mechanism in photosynthetic reaction centers

Hiroyuki Tamura, Keisuke Saito and Hiroshi Ishikita \*

Hiroshi Ishikita

Email: [hiro@appchem.t.u-tokyo.ac.jp](mailto:hiro@appchem.t.u-tokyo.ac.jp)

**This PDF file includes:**

Supplementary text  
Figures S1 to S3  
Tables S1 to S5  
Legends for Datasets S1 to S2  
SI References

**Other supplementary materials for this manuscript include the following:**

Datasets S1 to S2

### Supplementary Information Text

**Stretch of the chlorin ring along the Q<sub>y</sub> transition dipole moment.** From the observation of the PSII crystal structure (1), it seems likely that van der Waals contact of the Q<sub>A</sub> isoprene side chain and P<sub>D1</sub> make Chl<sub>D1</sub> deformed along the Q<sub>x</sub> transition dipole moment, and make it stretched toward the Q<sub>y</sub> transition dipole moment. Indeed, removal of Q<sub>A</sub> made the N...N distances of Chl<sub>D1</sub> lengthened toward the Q<sub>x</sub> transition dipole moment and shortened toward the Q<sub>y</sub> transition dipole moment (Table S3). It should also be noted that this does not hold for PbRC, because the Q<sub>B</sub> isoprene side chain, not the Q<sub>A</sub> isoprene side chain, is oriented toward B<sub>M</sub>.

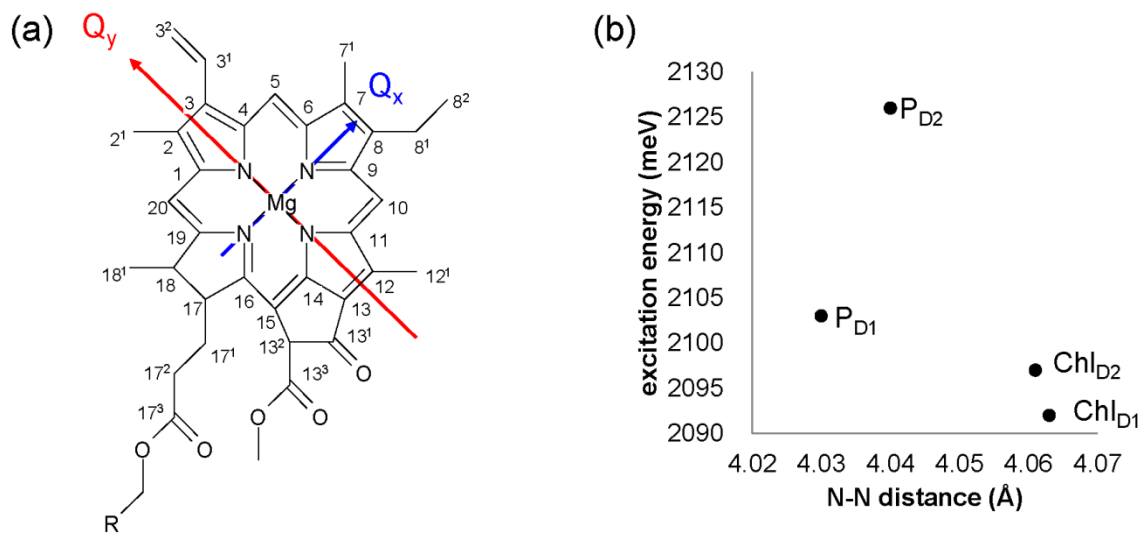

**Fig. S1.** (a) Orientations of the  $Q_x$  and  $Q_y$  transition dipole moments. (b) N...N distances along the  $Q_y$  transition dipole moments in Å and excitation energies of  $P_{D1}$ ,  $P_{D2}$ ,  $Chl_{D1}$ , and  $Chl_{D2}$  in meV.

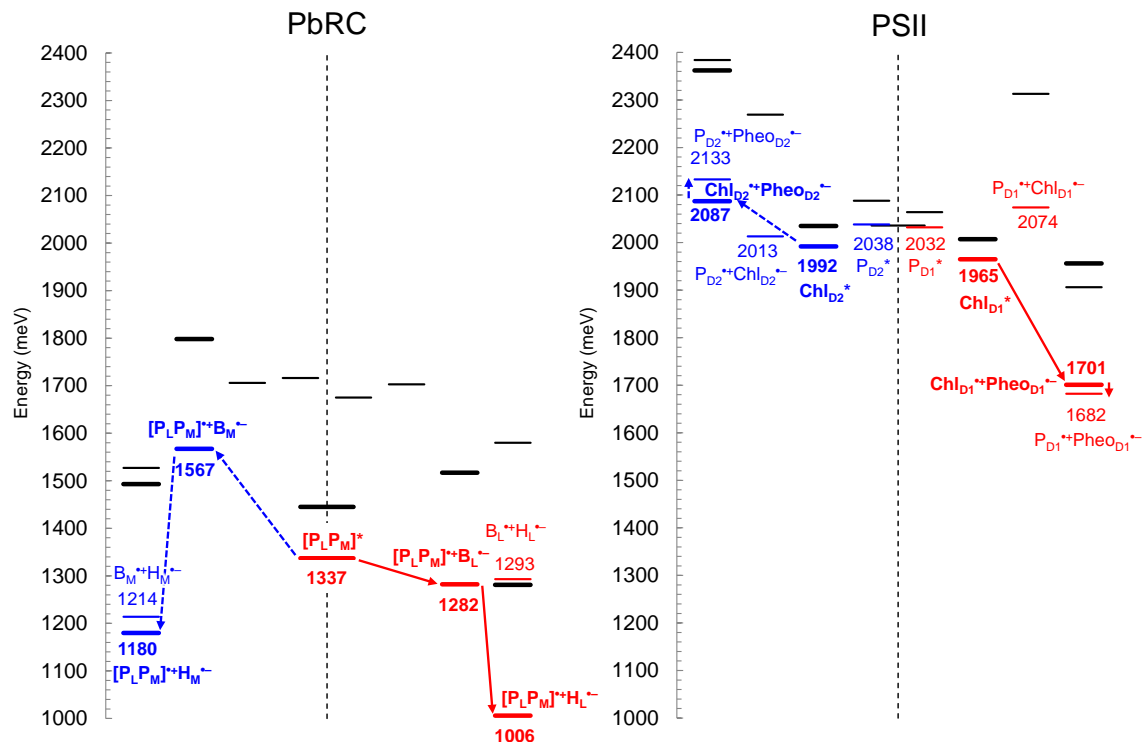

**Fig. S2.** Energy values for electronic excitation and charge-separated states of (B)Chla and (B)Pheoa in PbRC (left) and PSII (right) in the presence of the intramolecular reorganization energy, calculated using a QM/MM approach, where the interaction between electron and hole was considered quantum-chemically. Thick solid bars indicate the major intermediate states. Red solid bars and arrows indicate major electron transfer in the active branch, and blue solid bars and dotted arrows indicate the corresponding electron transfer in the inactive branch.

Assuming that the excitation energy is 1424 meV (870 nm) for  $[P_L P_M]$ , the corresponding energies are 1766 meV (702 nm) for  $B_L$ , and 1763 meV (703 nm) for  $B_M$  based on Figure S2.

Assuming that the excitation energy is 1822 meV (680 nm) for  $Chl_{D1}$ , the corresponding energies are 1889 meV (656 nm) for  $P_{D1}$ , 1895 meV (654 nm) for  $P_{D2}$ , and 1849 meV (670 nm) for  $Chl_{D2}$  based on Figure S2.

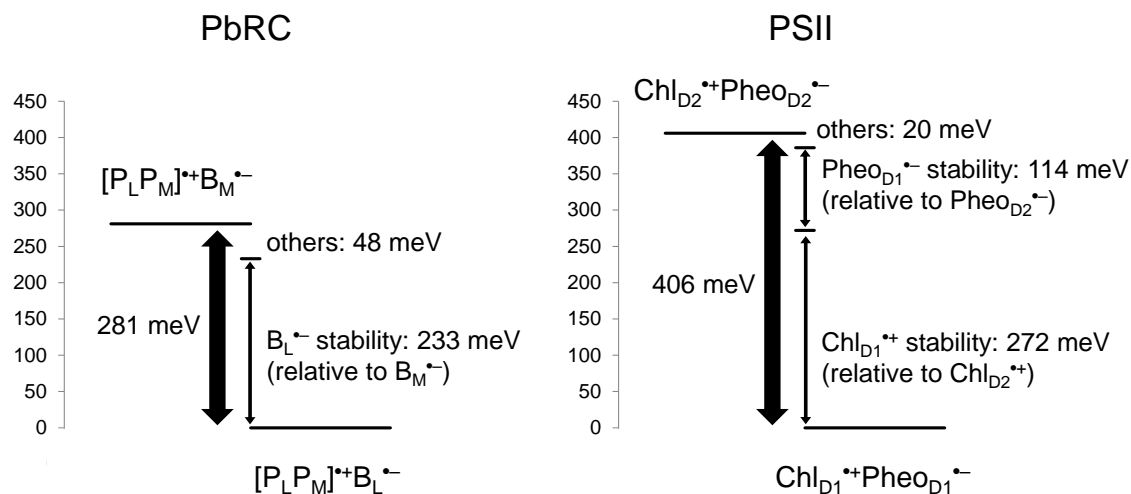

**Fig. S3.** Contribution of the cationic and anionic species to the energy difference in the charge-separated states between the active and inactive branches in meV.

**Table S1.** Coupling matrix for the  $[P_L P_M]$  bacteriochlorophyll pair in PbRC in meV. Values in brackets stand for the excited states calculated as the  $[P_L P_M]$  dimer bacteriochlorophylls in the PbRC protein environment. Note that values in Figure 2 were calculated as the  $P_L$  and  $P_M$  monomer bacteriochlorophylls, which are essentially the same as shown here.

|                            | $P_L^*$ | $P_M^*$ | $P_L^{**}P_M^{\leftarrow}$ | $P_L^{\leftarrow}P_M^{**}$ |
|----------------------------|---------|---------|----------------------------|----------------------------|
| $P_L^*$                    | (1673)  | -27     | -136                       | -113                       |
| $P_M^*$                    |         | (1704)  | -120                       | -138                       |
| $P_L^{**}P_M^{\leftarrow}$ |         |         | (1739)                     | 20                         |
| $P_L^{\leftarrow}P_M^{**}$ |         |         |                            | (1709)                     |

**Table S2.** Coupling matrix for the  $[P_{D1}P_{D2}]$  Chla pair in PSII in meV. Values in brackets stand for the excited states calculated as the  $[P_{D1}P_{D2}]$  dimer chlorophylls in the PSII protein environment. Note that values in Figure 2 were calculated as the  $P_{D1}$  and  $P_{D2}$  monomer chlorophylls, which are essentially the same as shown here.

|                          | $P_{D1}^*$ | $P_{D2}^*$ | $P_{D1}^{*+}P_{D2}^{*-}$ | $P_{D1}^{*-}P_{D2}^{*+}$ |
|--------------------------|------------|------------|--------------------------|--------------------------|
| $P_{D1}^*$               | (2051)     | -10        | 9                        | 10                       |
| $P_{D2}^*$               |            | (2071)     | 4                        | 32                       |
| $P_{D1}^{*+}P_{D2}^{*-}$ |            |            | (2140)                   | 4                        |
| $P_{D1}^{*-}P_{D2}^{*+}$ |            |            |                          | (2590)                   |

**Table S3.** N...N distances along the Qx and Qy transition dipole moments in the QM/MM-optimized geometry in Å.

|    | <b>P<sub>D1</sub></b> | <b>P<sub>D2</sub></b> | <b>ChI<sub>D1</sub></b> | <b>Q<sub>A</sub>-depleted ChI<sub>D1</sub></b> | <b>ChI<sub>D2</sub></b> |
|----|-----------------------|-----------------------|-------------------------|------------------------------------------------|-------------------------|
| Qx | 4.184                 | 4.243                 | 4.151                   | 4.167                                          | 4.191                   |
| Qy | 4.030                 | 4.040                 | 4.063                   | 4.057                                          | 4.061                   |



**Table S4.** Residues and water molecules that decrease the excitation energy of Chl<sub>D1</sub> and Chl<sub>D2</sub> with respect to P<sub>D1</sub> and P<sub>D2</sub> in meV.

|                                                            | P <sub>D1</sub> | P <sub>D2</sub> | Chl <sub>D1</sub> | Chl <sub>D2</sub> |
|------------------------------------------------------------|-----------------|-----------------|-------------------|-------------------|
| D1-His198 <sup>a</sup>                                     | 11              |                 |                   | 6                 |
| D2-His197 <sup>b</sup>                                     |                 | 10              | 7                 |                   |
| ligand H <sub>2</sub> O for Chl <sub>D1</sub> <sup>c</sup> |                 |                 | 8                 |                   |
| ligand H <sub>2</sub> O for Chl <sub>D2</sub> <sup>d</sup> |                 |                 |                   | 10                |
| H-bonding H <sub>2</sub> O (W382D) <sup>e</sup>            |                 | 3               | 15                |                   |
| H-bonding H <sub>2</sub> O (W349A) <sup>f</sup>            | 7               |                 |                   | 13                |
| <b>total</b>                                               | <b>18</b>       | <b>13</b>       | <b>30</b>         | <b>29</b>         |

<sup>a</sup> Serving as a ligand residue for P<sub>D1</sub> and an H-bond donor to W382D.

<sup>b</sup> Serving as a ligand residue for P<sub>D2</sub> and an H-bond donor to

<sup>c</sup> W424D and the second sphere ligand W1003A.

<sup>d</sup> W1009A and the second sphere ligand W359A.

<sup>e</sup> Donating an H-bond to the Chl<sub>D1</sub> keto group and accepting an H-bond from D2-His197.

<sup>f</sup> Donating an H-bond to the Chl<sub>D2</sub> keto group and accepting an H-bond from D1-His198.

**Table S5.** L/M residue pairs that stabilize  $H_L^{\bullet-}$  with respect to  $H_M^{\bullet-}$  (>40 meV) in the LUMO energy level in meV, i.e., corresponding to  $E_m$  for one-electron reduction.

|          | $E_m(H_L)$ | $E_m(H_M)$ |          | $E_m(H_L)$ | $E_m(H_M)$ | stabilizing $H_L^{\bullet-}$ |
|----------|------------|------------|----------|------------|------------|------------------------------|
| Glu-L104 | 128        | 3          | Thr-M133 | 0          | 8          | 117                          |
| Asp-L218 | -8         | -54        | Trp-M254 | -3         | 0          | 43                           |
| Tyr-L67  | 3          | 0          | Glu-M95  | -8         | -46        | 41                           |

**Dataset S1 (separate file).** QM/MM-optimized atomic coordinates for PbRC.

**Dataset S2 (separate file).** QM/MM-optimized atomic coordinates for PSII.

## References

1. Umena Y, Kawakami K, Shen J-R, & Kamiya N (2011) Crystal structure of oxygen-evolving photosystem II at a resolution of 1.9 Å. *Nature* 473:55-60.
